# Supplementary material
Source: ML conference proceedings conference paper supplement (https://openreview.net/forum?id=Viz7KBqO4A)

$p^* = [0. \ 0.2 \ 0.8]$

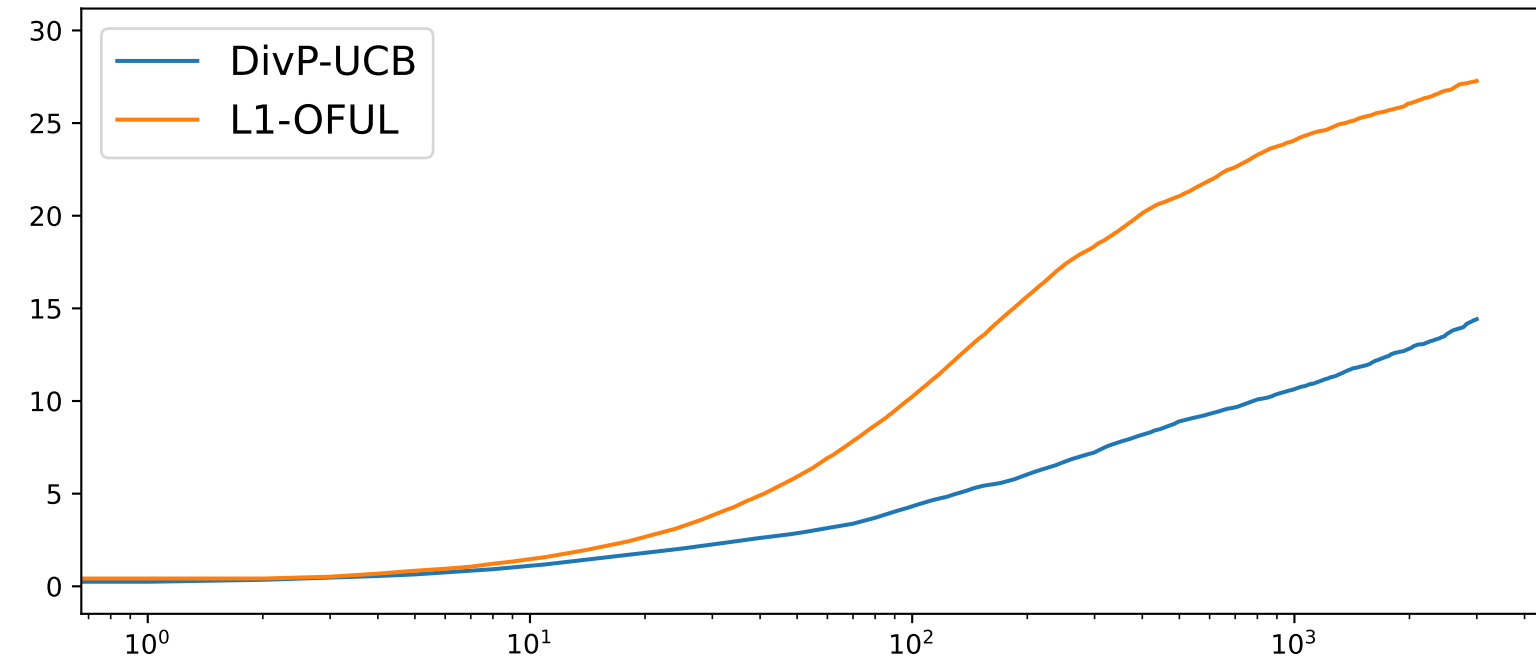

$p^* = [0.6 \ 0.2 \ 0.2]$

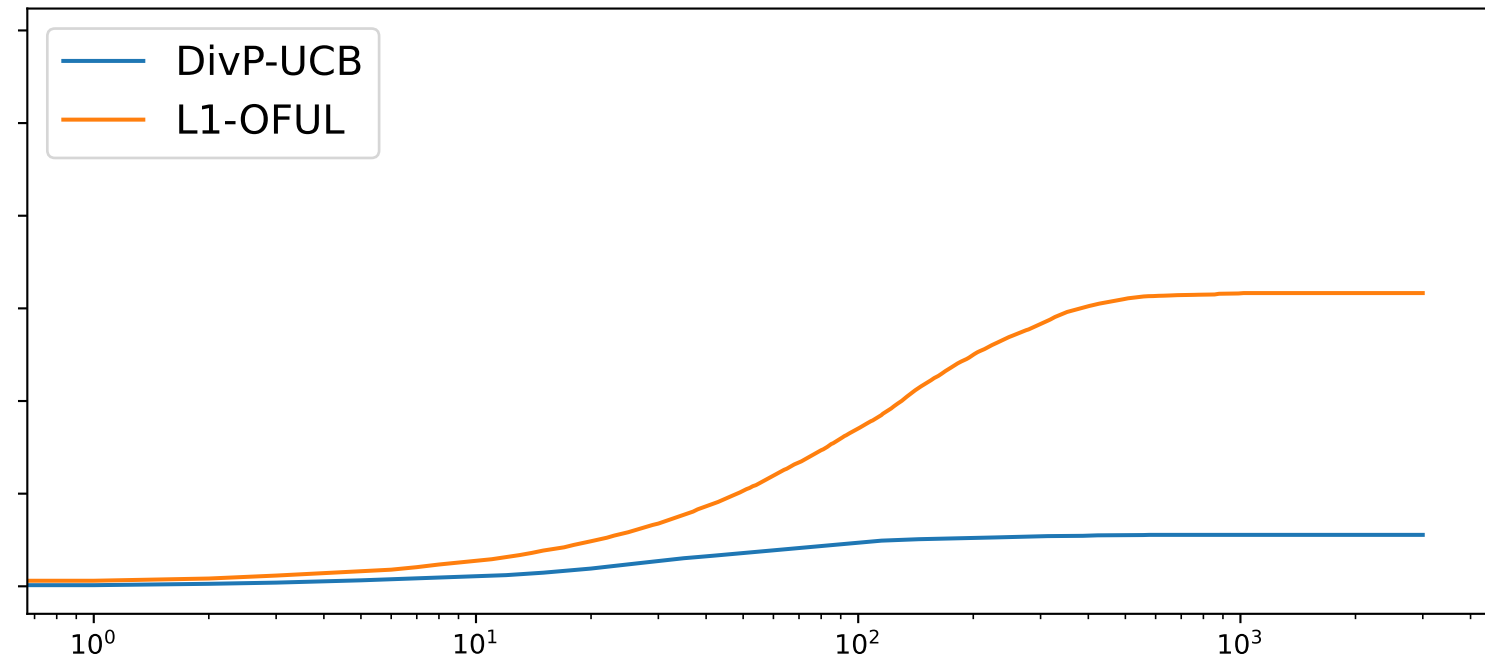

Supplement: supplementary_material [file attachment]
